# Supplementary material
Source: HighWire-hosted journal article supplement (https://bmjopen.bmj.com/content/6/3/e010345)
Supplement: inline-supplementary-material-1 [file inline-supplementary-material-1.pdf]

## Appendix

Table 1: Location distribution of hospitals performing revascularization

| Location Distribution |                     |           |          |
|-----------------------|---------------------|-----------|----------|
| City/District         | Percentage of Cases |           |          |
|                       | Total               | CABG Only | PCI Only |
| Bangalore             | 60%                 | 66%       | 54%      |
| Belguam               | 3.33%               | 6.67%     | 0%       |
| Davangere             | 2%                  | 3%        | 1%       |
| Dharwar               | 1%                  | 2%        | 0%       |
| Hubli                 | 0.17%               | 0.33%     | 0%       |
| Mandya                | 0.17%               | 0.33%     | 0%       |
| Mangalore             | 4.33%               | 6%        | 2.67%    |
| Manipal               | 4.50%               | 3.67%     | 5.33%    |
| Mysore                | 8.50%               | 4.67%     | 12.33%   |
| Rangareddy            | 0.33%               | 0.67%     | 0%       |
| Shimoga               | 5%                  | 6.67%     | 3.33%    |
| Udupi                 | 10.67%              | 0%        | 21.33%   |

Table 2: Drugs taken by patients upon admission

| Drugs being taken upon arrival |        |           |          |
|--------------------------------|--------|-----------|----------|
| Drug Class                     | Total  | CABG Only | PCI Only |
| Aspirin                        | 63.30% | 75.34%    | 51.34%   |
| Nitrates                       | 36.02% | 48.99%    | 23.15%   |
| Beta Blockers                  | 44.69% | 50.51%    | 38.92%   |
| Calcium Channel Blockers       | 10.27% | 17.57%    | 3.02%    |
| Other Cardiac Medication       | 58.75% | 54.39%    | 63%      |

Table 3: Drugs prescribed to patients upon discharge

| Drugs prescribed upon discharge |        |           |          |
|---------------------------------|--------|-----------|----------|
| Drug Class                      | Total  | CABG Only | PCI Only |
| Aspirin                         | 99%    | 98%       | 100%     |
| Nitrates                        | 38.66% | 40.74%    | 36.58%   |
| Beta Blockers                   | 53.92% | 58.86%    | 49%      |
| Calcium Channel Blockers        | 7.68%  | 15.05%    | 0.33%    |
| Thrombolytics                   | 2.02%  | 3.73%     | 0.33%    |
| Dyslipidaemic Agents            | 73.91% | 70.47%    | 77.33%   |
